# Supplementary material
Source: PubMed Central journal article supplement (PMC11382601)
Supplement: NIHMS1984040-supplement-Appendix_Note.pdf [file NIHMS1984040-supplement-Appendix_Note.pdf]

## Supplemental Materials

**S1:** Diagnosis Category ICD-10 Codes

**Abdominal Pain:** "ABDOMINAL PAIN" | "EPIGASTRIC ABDOMINAL PAIN" |  
"RUQ ABDOMINAL PAIN"

**Back Pain:** "LOW BACK PAIN" | "CHRONIC LOW BACK PAIN" | "LUMBAR  
RADICULOPATHY" | "CERVICAL RADICULOPATHY" | "NECK PAIN" | "CHRONIC LOW  
BACK PAIN W LUMBAR RADICULOPATHY" | "THORACIC SPINE PAIN" | "BACK PAIN"  
| "LUMBAR MUSCLE STRAIN, INIT"

**General Gastrointestinal:** "GERD (GASTROESOPHAGEAL REFLUX DISEASE)"  
|"ABDOMINAL BLOATING" | "DYSPEPSIA" | "IRRITABLE BOWEL SYNDROME" |  
"NAUSEA" | "DIARRHEA" | "CONSTIPATION" | "GASTROENTERITIS" | "GASTRITIS" |  
"RECTAL BLEEDING" | "EXTERNAL HEMORRHOID"

**Hypertension & Diabetes:** "HTN (HYPERTENSION)" | "DM 2" | "PREDIABETES" | "DM 2  
W HYPERLIPIDEMIA" | "ELEVATED BP READING WO HTN DIAGNOSIS" | "DM 2 W  
PERIPHERAL NEUROPATHY"

**Mental Health:** "ANXIETY" | "INSOMNIA" | "ANXIETY DISORDER" | "STRESS"  
|"ADJUSTMENT DISORDER W MIXED ANXIETY AND DEPRESSED MOOD" |  
"GENERALIZED ANXIETY DISORDER" | "ADJUSTMENT DISORDER W ANXIETY" |  
"MAJOR DEPRESSIVE DISORDER, RECURRENT EPISODE, MODERATE"

**Musculoskeletal Pain:** "RIGHT KNEE JOINT PAIN" | "LEFT KNEE JOINT PAIN" | "RIGHT  
SHOULDER JOINT PAIN" | "LEFT SHOULDER JOINT PAIN" | "RIGHT FOOT PAIN" |  
"LEFT FOOT PAIN" | "LEFT HAND PAIN" | "BILAT KNEE JOINT PAIN" | "JOINT PAIN" |  
"RIGHT HIP JOINT PAIN" | "LEFT HIP JOINT PAIN" | "RIGHT WRIST JOINT PAIN" |  
"RIGHT ANKLE JOINT PAIN" | "RIGHT HAND PAIN" | "LEFT ANKLE JOINT PAIN" |  
"LEFT WRIST JOINT PAIN" | "LEFT LEG PAIN" | "RIGHT LEG PAIN" | "RIGHT KNEE  
JOINT PAIN" | "LEFT KNEE JOINT PAIN" | "RIB PAIN" | "MYALGIA"

**Upper Respiratory:** "URI (UPPER RESPIRATORY INFECTION)" | "ALLERGIC RHINITIS" |  
"PHARYNGITIS" | "ACUTE SINUSITIS" | "SEASONAL ALLERGIC RHINITIS" | "THROAT  
PAIN" | "CHRONIC SINUSITIS"

**Skin & Soft Tissue:** "SKIN LESION" | "DERMATITIS" | "RASH" | "ACNE" | "CELLULITIS" |  
"ALOPECIA" | "SUBCUTANEOUS MASS" | "ECZEMA" | "SEBORRHEIC DERMATITIS" |  
"URTICARIA" | "FOLLICULITIS" | "HERPES ZOSTER" | "CONTACT DERMATITIS" |  
"PRURITUS" | "SKIN MASS"
